# Supplementary material
Source: PubMed Central journal article supplement (PMC6643556)

# *Phosphonium-Templated Iodoplumbates*

Emily H. Omahen,<sup>†</sup> Justin F. Binder,<sup>†</sup> Brad F. Jacobs,<sup>†</sup> Ala'aeddeen Swidan<sup>†</sup> and Charles L. B. Macdonald<sup>\*‡</sup>.

<sup>†</sup>Department of Chemistry and Biochemistry, University of Windsor, 401 Sunset Ave, Windsor, Ontario, Canada N9B 3P4

<sup>‡</sup>Department of Chemistry, Carlton University, 1125 Colonel By Drive, Ottawa, Ontario, Canada K1S 5B6

## Contents

|                                                                                                                                       |   |
|---------------------------------------------------------------------------------------------------------------------------------------|---|
| Table S1 Crystal data and structure refinement for [PMe <sub>4</sub> ][I].                                                            | 2 |
| Table S2 Crystal data and structure refinement for [PMe <sub>4</sub> ][PbI <sub>3</sub> ].                                            | 3 |
| Table S3 Crystal data and structure refinement for [P <sub>2</sub> C <sub>8</sub> H <sub>22</sub> ][Pb <sub>2</sub> I <sub>6</sub> ]. | 4 |
| Table S4 Crystal data and structure refinement for [PMePh <sub>3</sub> ][PbI <sub>3</sub> ]·MeCN.                                     | 5 |
| Table S5 Crystal data and structure refinement for [PHBu <sub>3</sub> ][PbI <sub>3</sub> ].                                           | 6 |
| DSC results                                                                                                                           | 7 |

**Table S1 Crystal data and structure refinement for [PMe<sub>4</sub>][I].**

|                                             |                                                              |
|---------------------------------------------|--------------------------------------------------------------|
| Identification code                         | 1858273                                                      |
| Empirical formula                           | C <sub>4</sub> H <sub>12</sub> IP                            |
| Formula weight                              | 218.01                                                       |
| Temperature/K                               | 170.0                                                        |
| Crystal system                              | tetragonal                                                   |
| Space group                                 | P4/nmm                                                       |
| a/Å                                         | 8.1978(10)                                                   |
| b/Å                                         | 8.1978(10)                                                   |
| c/Å                                         | 6.0037(8)                                                    |
| α/°                                         | 90                                                           |
| β/°                                         | 90                                                           |
| γ/°                                         | 90                                                           |
| Volume/Å <sup>3</sup>                       | 403.47(11)                                                   |
| Z                                           | 2                                                            |
| ρ <sub>calc</sub> /g/cm <sup>3</sup>        | 1.794                                                        |
| μ/mm <sup>-1</sup>                          | 4.061                                                        |
| F(000)                                      | 208.0                                                        |
| Crystal size/mm <sup>3</sup>                | 0.2 × 0.1 × 0.015                                            |
| Radiation                                   | MoKα (λ = 0.71073)                                           |
| 2θ range for data collection/°              | 6.786 to 65.036                                              |
| Index ranges                                | -12 ≤ h ≤ 10, -12 ≤ k ≤ 12, -9 ≤ l ≤ 9                       |
| Reflections collected                       | 7940                                                         |
| Independent reflections                     | 448 [R <sub>int</sub> = 0.0702, R <sub>sigma</sub> = 0.0253] |
| Data/restraints/parameters                  | 448/0/13                                                     |
| Goodness-of-fit on F <sup>2</sup>           | 1.232                                                        |
| Final R indexes [I ≥ 2σ (I)]                | R <sub>1</sub> = 0.0423, wR <sub>2</sub> = 0.0914            |
| Final R indexes [all data]                  | R <sub>1</sub> = 0.0501, wR <sub>2</sub> = 0.0962            |
| Largest diff. peak/hole / e Å <sup>-3</sup> | 2.90/-1.04                                                   |

**Table S2 Crystal data and structure refinement for [PMe<sub>4</sub>][PbI<sub>3</sub>].**

|                                             |                                                               |
|---------------------------------------------|---------------------------------------------------------------|
| Identification code                         | 1858275                                                       |
| Empirical formula                           | C <sub>4</sub> H <sub>12</sub> I <sub>3</sub> PPb             |
| Formula weight                              | 679.00                                                        |
| Temperature/K                               | 170(2)                                                        |
| Crystal system                              | hexagonal                                                     |
| Space group                                 | P6 <sub>5</sub>                                               |
| a/Å                                         | 10.0382(8)                                                    |
| b/Å                                         | 10.0382(8)                                                    |
| c/Å                                         | 23.738(2)                                                     |
| α/°                                         | 90                                                            |
| β/°                                         | 90                                                            |
| γ/°                                         | 120                                                           |
| Volume/Å <sup>3</sup>                       | 2071.5(4)                                                     |
| Z                                           | 6                                                             |
| ρ <sub>calc</sub> /cm <sup>3</sup>          | 3.266                                                         |
| μ/mm <sup>-1</sup>                          | 18.987                                                        |
| F(000)                                      | 1752.0                                                        |
| Crystal size/mm <sup>3</sup>                | 0.600 × 0.280 × 0.150                                         |
| Radiation                                   | MoKα (λ = 0.71073)                                            |
| 2θ range for data collection/°              | 5.808 to 61.136                                               |
| Index ranges                                | -14 ≤ h ≤ 13, -14 ≤ k ≤ 14, -33 ≤ l ≤ 33                      |
| Reflections collected                       | 36416                                                         |
| Independent reflections                     | 4194 [R <sub>int</sub> = 0.0620, R <sub>sigma</sub> = 0.0314] |
| Data/restraints/parameters                  | 4194/1/88                                                     |
| Goodness-of-fit on F <sup>2</sup>           | 1.108                                                         |
| Final R indexes [I ≥ 2σ (I)]                | R <sub>1</sub> = 0.0471, wR <sub>2</sub> = 0.1125             |
| Final R indexes [all data]                  | R <sub>1</sub> = 0.0489, wR <sub>2</sub> = 0.1144             |
| Largest diff. peak/hole / e Å <sup>-3</sup> | 4.45/-4.16                                                    |
| Flack parameter                             | 0.491(10)                                                     |

A-level alerts in the checkCIF/PLATON report flag residual electron density near the lead atoms. This is due to the strongly absorbing lead iodide atoms and Fourier truncation effects. The nature of the atom as lead is not in doubt.

**Table S3 Crystal data and structure refinement for [P<sub>2</sub>C<sub>8</sub>H<sub>22</sub>][Pb<sub>2</sub>I<sub>6</sub>]**

|                                             |                                                                              |
|---------------------------------------------|------------------------------------------------------------------------------|
| Identification code                         | 1858274                                                                      |
| Empirical formula                           | C <sub>8</sub> H <sub>22</sub> I <sub>6</sub> P <sub>2</sub> Pb <sub>2</sub> |
| Formula weight                              | 1355.97                                                                      |
| Temperature/K                               | 170(2)                                                                       |
| Crystal system                              | monoclinic                                                                   |
| Space group                                 | C2/m                                                                         |
| a/Å                                         | 15.3593(6)                                                                   |
| b/Å                                         | 11.1506(4)                                                                   |
| c/Å                                         | 7.9441(3)                                                                    |
| α/°                                         | 90                                                                           |
| β/°                                         | 100.8890(10)                                                                 |
| γ/°                                         | 90                                                                           |
| Volume/Å <sup>3</sup>                       | 1336.05(9)                                                                   |
| Z                                           | 2                                                                            |
| ρ <sub>calc</sub> /cm <sup>3</sup>          | 3.371                                                                        |
| μ/mm <sup>-1</sup>                          | 19.626                                                                       |
| F(000)                                      | 1164.0                                                                       |
| Crystal size/mm <sup>3</sup>                | 0.5 × 0.4 × 0.3                                                              |
| Radiation                                   | MoKα (λ = 0.71073)                                                           |
| 2θ range for data collection/°              | 6.526 to 66.356                                                              |
| Index ranges                                | -22 ≤ h ≤ 23, -17 ≤ k ≤ 15, -12 ≤ l ≤ 12                                     |
| Reflections collected                       | 33343                                                                        |
| Independent reflections                     | 2676 [R <sub>int</sub> = 0.0498, R <sub>sigma</sub> = 0.0228]                |
| Data/restraints/parameters                  | 2676/18/71                                                                   |
| Goodness-of-fit on F <sup>2</sup>           | 1.062                                                                        |
| Final R indexes [I ≥ 2σ (I)]                | R <sub>1</sub> = 0.0296, wR <sub>2</sub> = 0.0661                            |
| Final R indexes [all data]                  | R <sub>1</sub> = 0.0409, wR <sub>2</sub> = 0.0718                            |
| Largest diff. peak/hole / e Å <sup>-3</sup> | 3.19/-3.02                                                                   |

**Table S4 Crystal data and structure refinement for [PMePh<sub>3</sub>][PbI<sub>3</sub>]-MeCN.**

|                                             |                                                                                |
|---------------------------------------------|--------------------------------------------------------------------------------|
| Identification code                         | 1858276                                                                        |
| Empirical formula                           | C <sub>40</sub> H <sub>39</sub> I <sub>6</sub> NP <sub>2</sub> Pb <sub>2</sub> |
| Formula weight                              | 1771.44                                                                        |
| Temperature/K                               | 170(2)                                                                         |
| Crystal system                              | monoclinic                                                                     |
| Space group                                 | C2/c                                                                           |
| a/Å                                         | 24.560(2)                                                                      |
| b/Å                                         | 13.0686(11)                                                                    |
| c/Å                                         | 16.1499(14)                                                                    |
| α/°                                         | 90                                                                             |
| β/°                                         | 110.037(2)                                                                     |
| γ/°                                         | 90                                                                             |
| Volume/Å <sup>3</sup>                       | 4869.8(7)                                                                      |
| Z                                           | 4                                                                              |
| ρ <sub>calc</sub> /cm <sup>3</sup>          | 2.416                                                                          |
| μ/mm <sup>-1</sup>                          | 10.802                                                                         |
| F(000)                                      | 3192.0                                                                         |
| Crystal size/mm <sup>3</sup>                | 0.530 × 0.500 × 0.470                                                          |
| Radiation                                   | MoKα (λ = 0.71073)                                                             |
| 2θ range for data collection/°              | 5.932 to 66.52                                                                 |
| Index ranges                                | -37 ≤ h ≤ 37, -20 ≤ k ≤ 20, -24 ≤ l ≤ 24                                       |
| Reflections collected                       | 76614                                                                          |
| Independent reflections                     | 9334 [R <sub>int</sub> = 0.0564, R <sub>sigma</sub> = 0.0331]                  |
| Data/restraints/parameters                  | 9334/0/254                                                                     |
| Goodness-of-fit on F <sup>2</sup>           | 1.154                                                                          |
| Final R indexes [I ≥ 2σ (I)]                | R <sub>1</sub> = 0.0371, wR <sub>2</sub> = 0.0783                              |
| Final R indexes [all data]                  | R <sub>1</sub> = 0.0522, wR <sub>2</sub> = 0.0854                              |
| Largest diff. peak/hole / e Å <sup>-3</sup> | 2.50/-4.19                                                                     |

A-level alerts in the checkCIF/PLATON report flag residual electron density near the lead atoms. This is due to the strongly absorbing lead iodide atoms and Fourier truncation effects. The nature of the atom as lead is not in doubt.

**Table S5 Crystal data and structure refinement for [PHBu<sub>3</sub>][PbI<sub>3</sub>].**

|                                             |                                                                |
|---------------------------------------------|----------------------------------------------------------------|
| Identification code                         | 1858277                                                        |
| Empirical formula                           | C <sub>12</sub> H <sub>28</sub> I <sub>3</sub> PPb             |
| Formula weight                              | 791.20                                                         |
| Temperature/K                               | 170(2)                                                         |
| Crystal system                              | monoclinic                                                     |
| Space group                                 | P2 <sub>1</sub>                                                |
| a/Å                                         | 16.0770(7)                                                     |
| b/Å                                         | 16.3313(9)                                                     |
| c/Å                                         | 16.9952(9)                                                     |
| α/°                                         | 90                                                             |
| β/°                                         | 107.066(2)                                                     |
| γ/°                                         | 90                                                             |
| Volume/Å <sup>3</sup>                       | 4265.7(4)                                                      |
| Z                                           | 8                                                              |
| ρ <sub>calc</sub> /g/cm <sup>3</sup>        | 2.464                                                          |
| μ/mm <sup>-1</sup>                          | 12.313                                                         |
| F(000)                                      | 2848.0                                                         |
| Crystal size/mm <sup>3</sup>                | 0.420 × 0.200 × 0.200                                          |
| Radiation                                   | MoKα (λ = 0.71073)                                             |
| 2θ range for data collection/°              | 5.728 to 61.136                                                |
| Index ranges                                | -22 ≤ h ≤ 21, -23 ≤ k ≤ 23, -24 ≤ l ≤ 24                       |
| Reflections collected                       | 208613                                                         |
| Independent reflections                     | 25712 [R <sub>int</sub> = 0.0807, R <sub>sigma</sub> = 0.0565] |
| Data/restraints/parameters                  | 25712/105/608                                                  |
| Goodness-of-fit on F <sup>2</sup>           | 1.113                                                          |
| Final R indexes [I ≥ 2σ (I)]                | R <sub>1</sub> = 0.0552, wR <sub>2</sub> = 0.1097              |
| Final R indexes [all data]                  | R <sub>1</sub> = 0.1017, wR <sub>2</sub> = 0.1364              |
| Largest diff. peak/hole / e Å <sup>-3</sup> | 3.76/-4.03                                                     |
| Flack parameter                             | 0.260(7)                                                       |

A-level alerts in the checkCIF/PLATON report are due to disorder of the butyl chains which were modelled as appropriately as possible. The nature of the atoms as carbon is not in doubt. Proximity of the hydrogen atoms is due to the disorder model used.

## DSC results

Method: 25 to 225 °C at 10 °Cmin<sup>-1</sup>, 1 minute isotherm at 225 °C, 225 – 25 °C at 10 °Cmin<sup>-1</sup>, 1 minute isotherm at 25 °C, 25 to 225 °C at 10 °Cmin<sup>-1</sup>, 1 minute isotherm at 225 °C, 225 – 25 °C at 10 °Cmin<sup>-1</sup>.

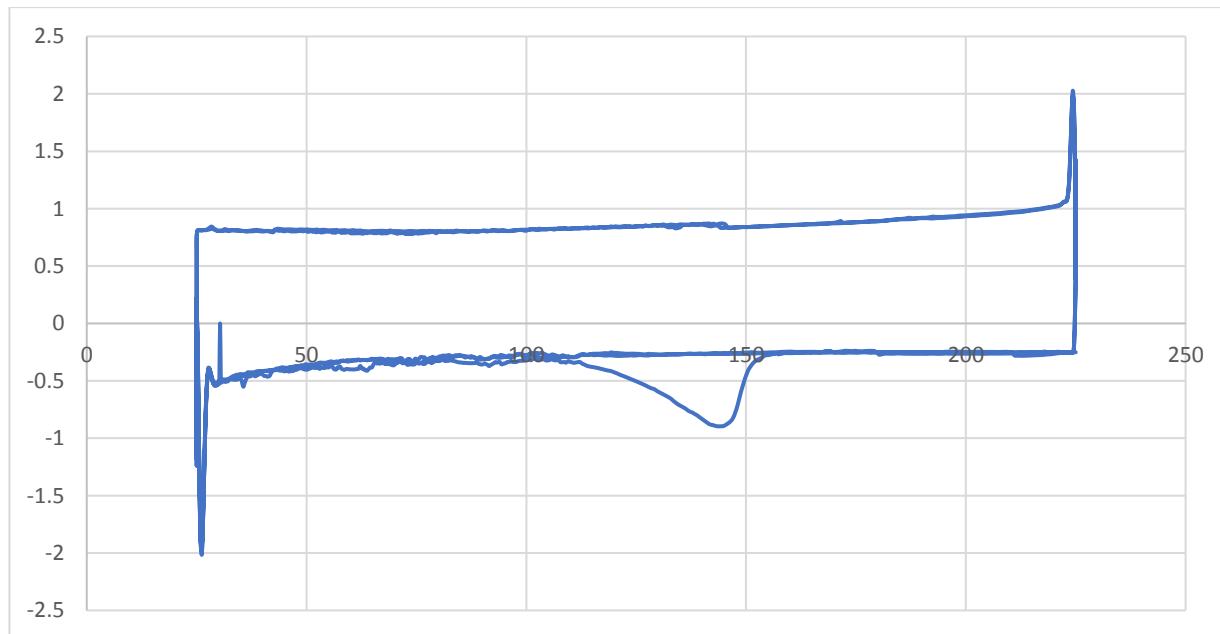

De-solvation of toluene peak at ca. 100 °C.

1,2-bis(trimethylphosphonio)ethane triiodoplumbate (II), **[P<sub>2</sub>C<sub>8</sub>H<sub>22</sub>][Pb<sub>2</sub>I<sub>6</sub>]**

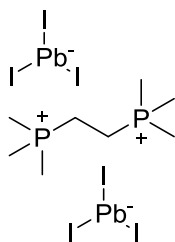

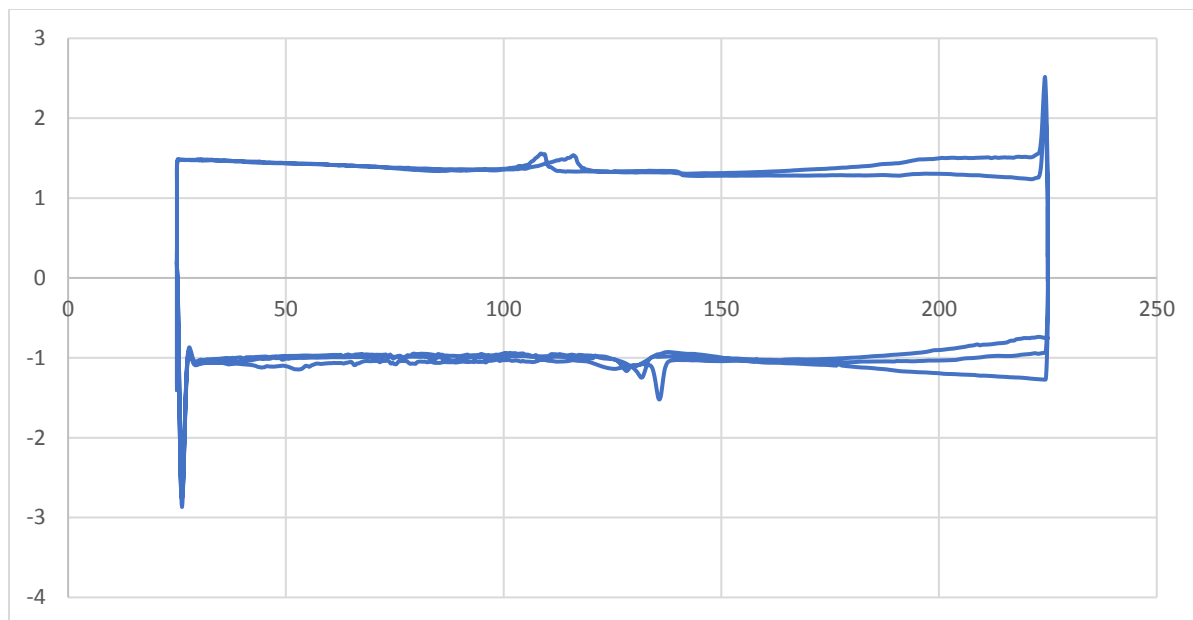

No observed events.

Tributylphosphonium triiodoplumbate (II),  
**[PHBu<sub>3</sub>][PbI<sub>3</sub>]**

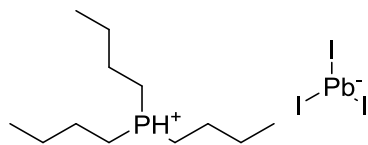

| Trace    | Melt    | Recrys. |
|----------|---------|---------|
| <b>1</b> | 125.5   | 116     |
| <b>2</b> | 135.833 | 108.667 |
| <b>3</b> | 131.667 |         |



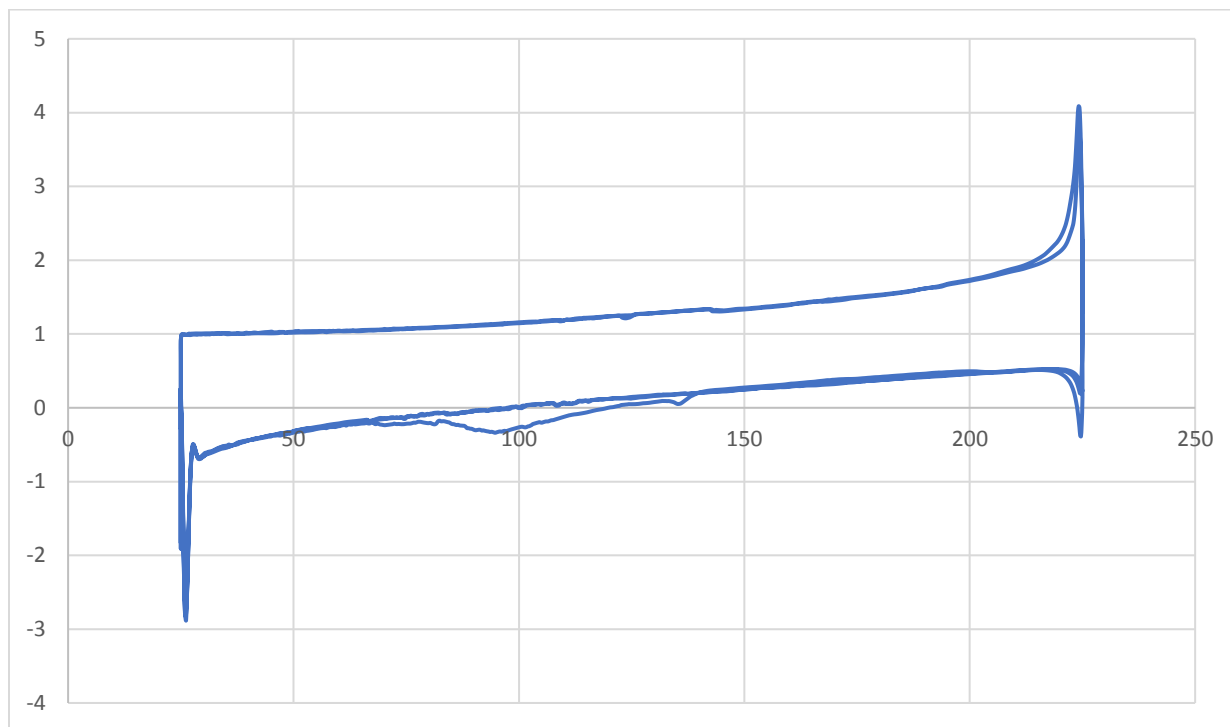

First trace: de-solvation at 94.33; no other noticeable differences.

Methyltriphenylphosphonium triiodoplumbate (II) ,  $[\text{PMePh}_3][\text{PbI}_3] \cdot \text{MeCN}$

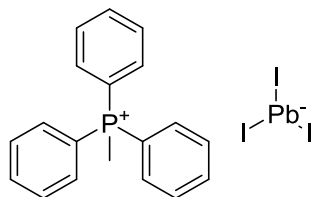

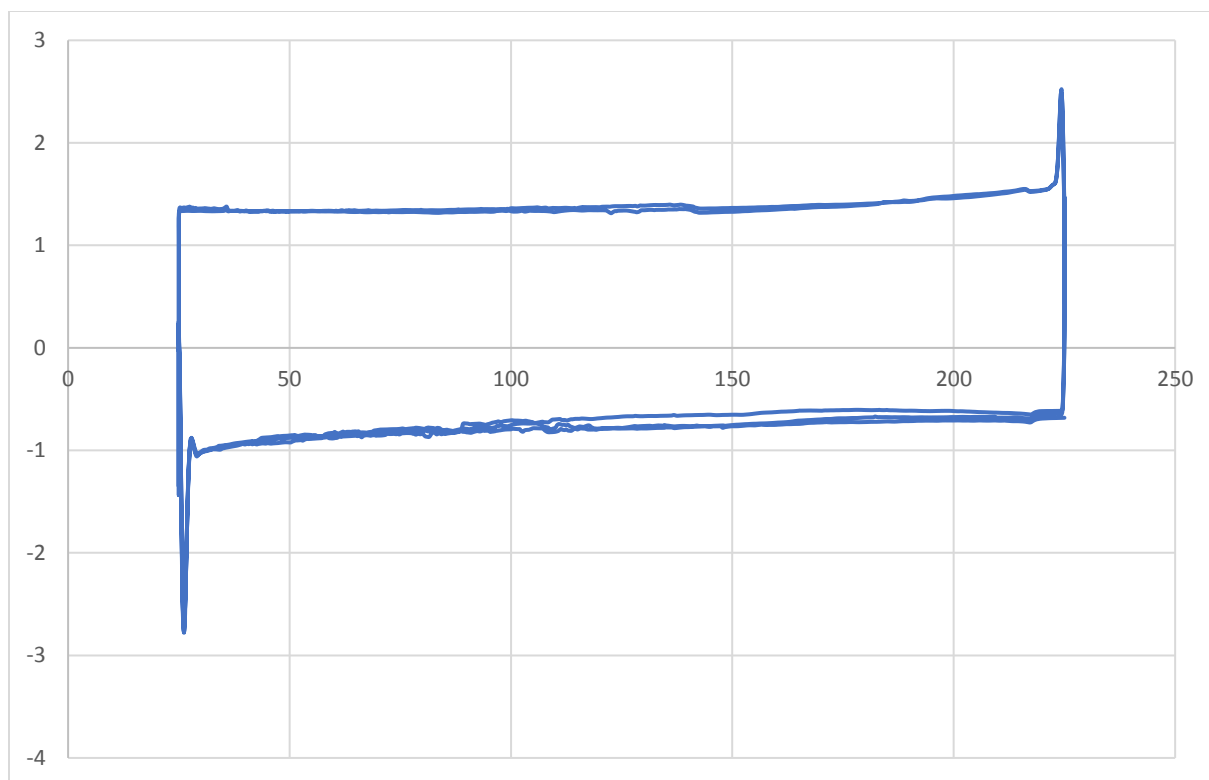

No observed events.

Tetramethylphosphonium triiodoplumbate (II),  $[\text{PMe}_4][\text{PbI}_3]$

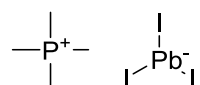

Supplement: ao8b02240_si_001.pdf [file ao8b02240_si_001.pdf]
